# Supplementary material for: Metal Ion Chelates as Surrogates of Nucleobases for the Recognition of Nucleic Acid Sequences: ThePd2+Complex of 2,6-Bis(3,5-dimethylpyrazol-1-yl)purine Riboside
Source: Hindawi journal article supplement (doi:10.1155/2012/196845), 2012-01-01
Supplement: f1 [file 196845.f1.pdf]

**Supporting Information for:**

**METAL ION CHELATES AS SURROGATES OF NUCLEOBASES FOR THE RECOGNITION OF NUCLEIC ACID SEQUENCES:  
THE Pd<sup>2+</sup> COMPLEX OF 2,6-BIS(3,5-DIMETHYLPYRAZOL-1-YL)PURINE RIBOSIDE**

Sharmin Taherpour and Tuomas Lönnberg\*

*Department of Chemistry, University of Turku, Vatselankatu 2, FIN-20014, Turku, Finland*

*Email: tuanlo@utu.fi*

**Contents:**

|                                                                                                                                                               |     |
|---------------------------------------------------------------------------------------------------------------------------------------------------------------|-----|
| <i>T</i> vs. 1- $\Delta A/\Delta A(\max)$ profiles of the heteroduplexes formed between <b>7A</b> and DNA oligonucleotides.....                               | S3  |
| <i>T</i> vs. 1- $\Delta A/\Delta A(\max)$ profiles of the heteroduplexes formed between <b>7X</b> and DNA oligonucleotides.....                               | S4  |
| <i>T</i> vs. 1- $\Delta A/\Delta A(\max)$ profiles of the homoduplexes formed between <b>7A</b> and 2'- <i>O</i> -methyl-RNA oligonucleotides.....            | S5  |
| <i>T</i> vs. 1- $\Delta A/\Delta A(\max)$ profiles of the homoduplexes formed between <b>7A</b> and 2'- <i>O</i> -methyl-RNA oligonucleotides.....            | S6  |
| <i>T</i> vs. 1- $\Delta A/\Delta A(\max)$ profiles of the mismatched homoduplexes formed between <b>7A</b> and 2'- <i>O</i> -methyl-RNA oligonucleotides..... | S7  |
| <i>T</i> vs. 1- $\Delta A/\Delta A(\max)$ profiles of the mismatched homoduplexes formed between <b>7A</b> and 2'- <i>O</i> -methyl-RNA oligonucleotides..... | S8  |
| CD spectra of the homoduplex <b>7X:8U</b> in the absence and presence of Pd <sup>2+</sup> .....                                                               | S9  |
| CD spectra of the homoduplex <b>7A:8U</b> in the absence and presence of Pd <sup>2+</sup> .....                                                               | S10 |
| CD spectra of the homoduplex <b>7X:8C</b> in the absence and presence of Pd <sup>2+</sup> .....                                                               | S11 |
| CD spectra of the homoduplex <b>7A:8C</b> in the absence and presence of Pd <sup>2+</sup> .....                                                               | S12 |
| CD spectra of the homoduplex <b>7X:8G</b> in the absence and presence of Pd <sup>2+</sup> .....                                                               | S13 |

|                                                                                                            |     |
|------------------------------------------------------------------------------------------------------------|-----|
| CD spectra of the homoduplex <b>7A:8G</b> in the absence and presence of Pd <sup>2+</sup> .....            | S14 |
| CD spectra of the homoduplex <b>7X:8A</b> in the absence and presence of Pd <sup>2+</sup> .....            | S15 |
| CD spectra of the homoduplex <b>7A:8A</b> in the absence and presence of Pd <sup>2+</sup> .....            | S16 |
| CD spectra of the heteroduplex <b>7X:10A</b> in the absence and presence of Pd <sup>2+</sup> .....         | S17 |
| CD spectra of the heteroduplex <b>7A:10A</b> in the absence and presence of Pd <sup>2+</sup> .....         | S18 |
| CD spectra of the heteroduplex <b>7X:10C</b> in the absence and presence of Pd <sup>2+</sup> .....         | S19 |
| CD spectra of the heteroduplex <b>7A:10C</b> in the absence and presence of Pd <sup>2+</sup> .....         | S20 |
| CD spectra of the heteroduplex <b>7X:10G</b> in the absence and presence of Pd <sup>2+</sup> .....         | S21 |
| CD spectra of the heteroduplex <b>7A:10G</b> in the absence and presence of Pd <sup>2+</sup> .....         | S22 |
| CD spectra of the mismatched homoduplex <b>7X:9A</b> in the absence and presence of Pd <sup>2+</sup> ..... | S23 |
| CD spectra of the mismatched homoduplex <b>7A:9A</b> in the absence and presence of Pd <sup>2+</sup> ..... | S24 |
| CD spectra of the mismatched homoduplex <b>7X:9C</b> in the absence and presence of Pd <sup>2+</sup> ..... | S25 |
| CD spectra of the mismatched homoduplex <b>7A:9C</b> in the absence and presence of Pd <sup>2+</sup> ..... | S26 |
| CD spectra of the mismatched homoduplex <b>7X:9G</b> in the absence and presence of Pd <sup>2+</sup> ..... | S27 |
| CD spectra of the mismatched homoduplex <b>7A:9G</b> in the absence and presence of Pd <sup>2+</sup> ..... | S28 |
| CD spectra of the mismatched homoduplex <b>7X:9U</b> in the absence and presence of Pd <sup>2+</sup> ..... | S29 |
| CD spectra of the mismatched homoduplex <b>7A:9U</b> in the absence and presence of Pd <sup>2+</sup> ..... | S30 |
| ESI <sup>+</sup> mass spectrum of the modified oligonucleotide <b>7X</b> .....                             | S31 |

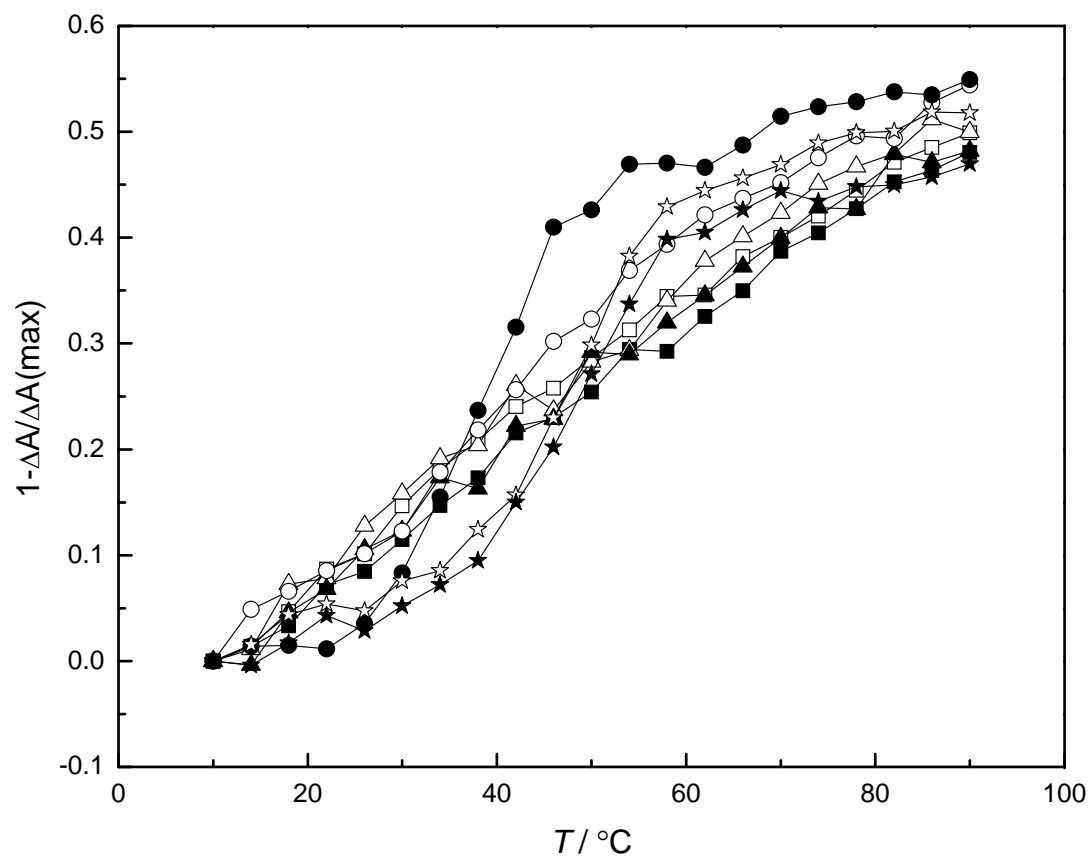

**Figure S1.** Temperature vs.  $1 - \Delta A / \Delta A(\max)$  profiles of the heteroduplexes formed between **7A** and DNA oligonucleotides in the presence and absence of  $\text{Pd}^{2+}$ ; scan range 220 – 320 nm;  $I(\text{NaClO}_4) = 0.1 \text{ M}$ ;  $\text{pH} = 7.4$ . ( $\square$ ) **7A:10C**, ( $\blacksquare$ ) **7A:10C + Pd<sup>2+</sup>**, ( $\circ$ ) **7A:10G**, ( $\bullet$ ) **7A:10G + Pd<sup>2+</sup>**, ( $\star$ ) **7A:10T**, ( $\blackstar$ ) **7A:10T + Pd<sup>2+</sup>**, ( $\triangle$ ) **7A:10A**, ( $\blacktriangle$ ) **7A:10A + Pd<sup>2+</sup>**.

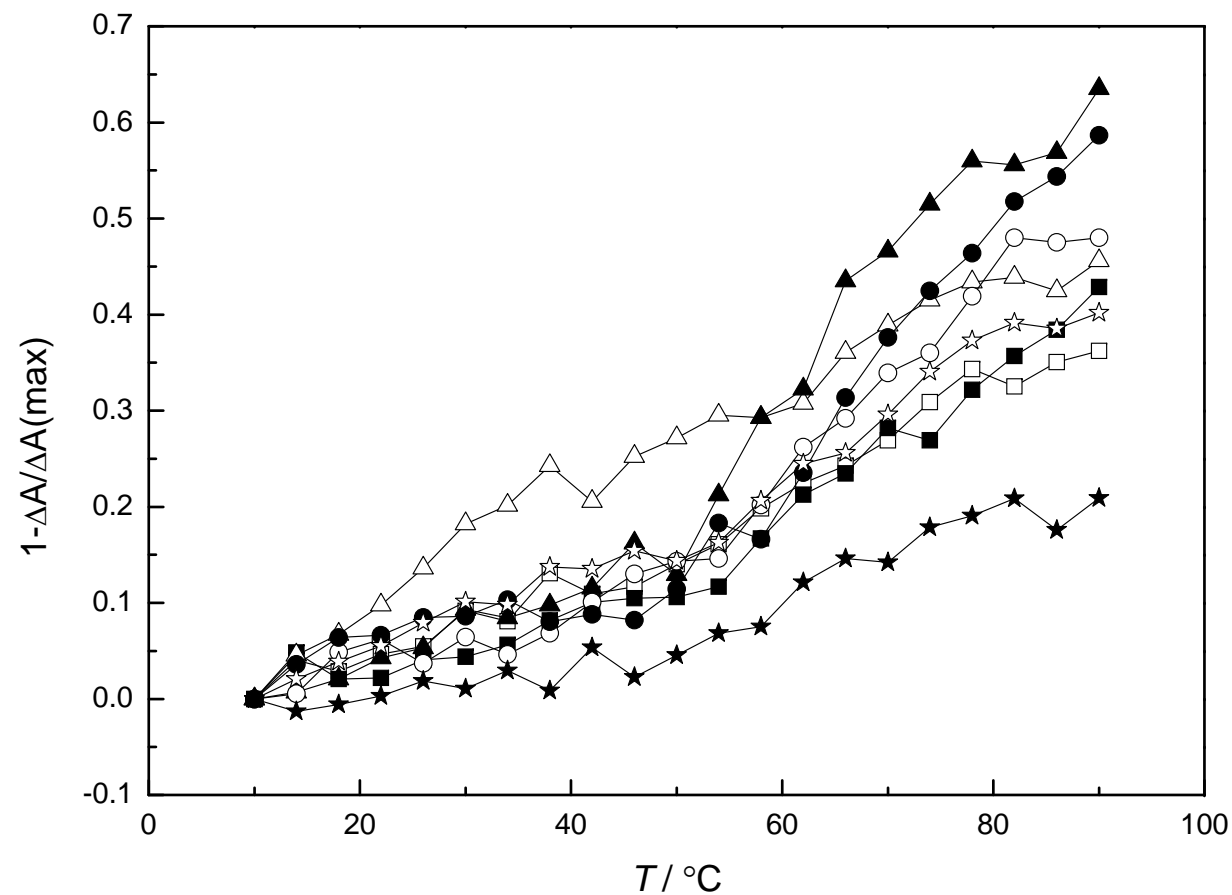

**Figure S2.** Temperature vs.  $1 - \Delta A / \Delta A(\max)$  profiles of the heteroduplexes formed between **7X** and DNA oligonucleotides in the presence and absence of  $\text{Pd}^{2+}$ ; scan range 220 – 320 nm;  $I(\text{NaClO}_4) = 0.1 \text{ M}$ ;  $\text{pH} = 7.4$ . (□) **7X:10C**, (■) **7X:10C + Pd<sup>2+</sup>**, (○) **7X:10G**, (●) **7X:10G + Pd<sup>2+</sup>**, (☆) **7X:10T**, (★) **7X:10T + Pd<sup>2+</sup>**, (△) **7X:10A**, (▲) **7X:10A + Pd<sup>2+</sup>**.

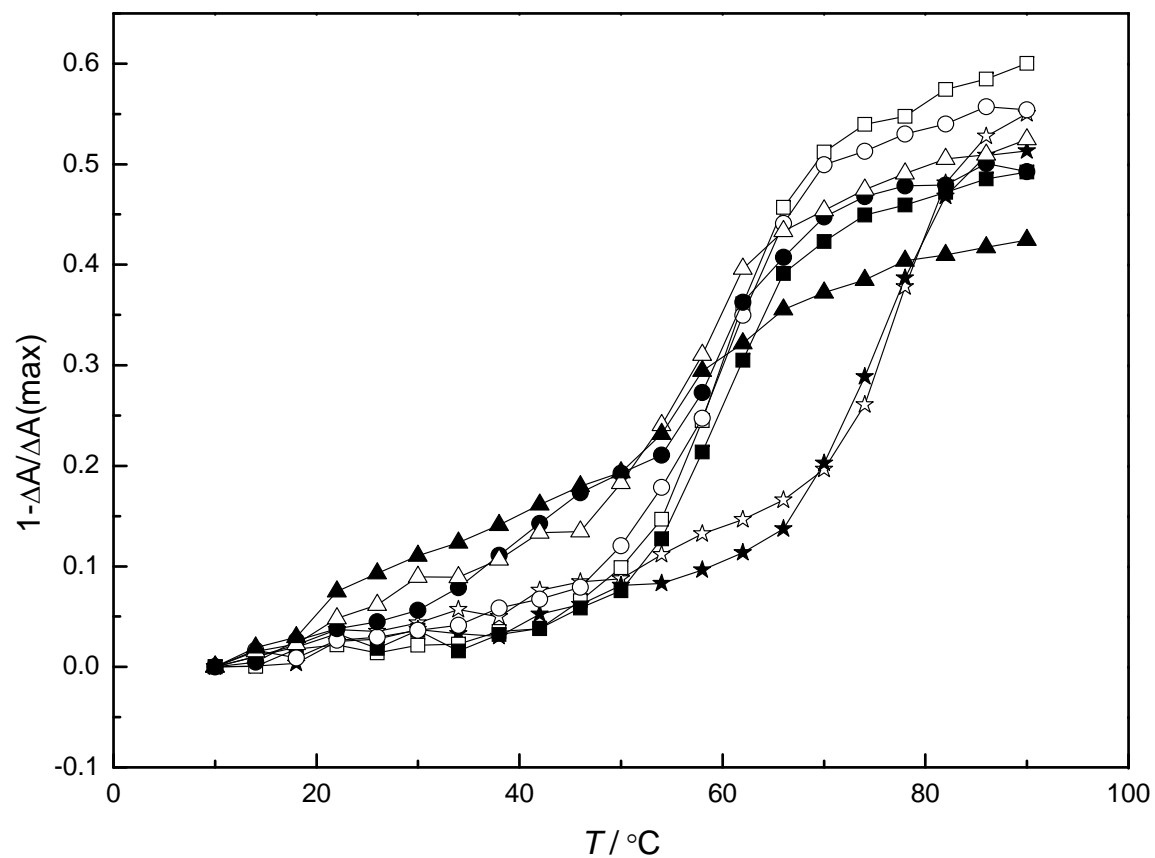

**Figure S3.** Temperature vs.  $1 - \Delta A / \Delta A(\max)$  profiles of the homoduplexes formed between **7A** and 2'-*O*-methyl-RNA oligonucleotides in the presence and absence of  $\text{Pd}^{2+}$ ; scan range 220 – 320 nm;  $I(\text{NaClO}_4) = 0.1 \text{ M}$ ;  $\text{pH} = 7.4$ . ( $\square$ ) **7A:8C**, ( $\blacksquare$ ) **7A:8C + Pd<sup>2+</sup>**, ( $\circ$ ) **7A:8G**, ( $\bullet$ ) **7A:8G + Pd<sup>2+</sup>**, ( $\star$ ) **7A:8U**, ( $\blackstar$ ) **7A:8U + Pd<sup>2+</sup>**, ( $\triangle$ ) **7A:8A**, ( $\blacktriangle$ ) **7A:8A + Pd<sup>2+</sup>**.

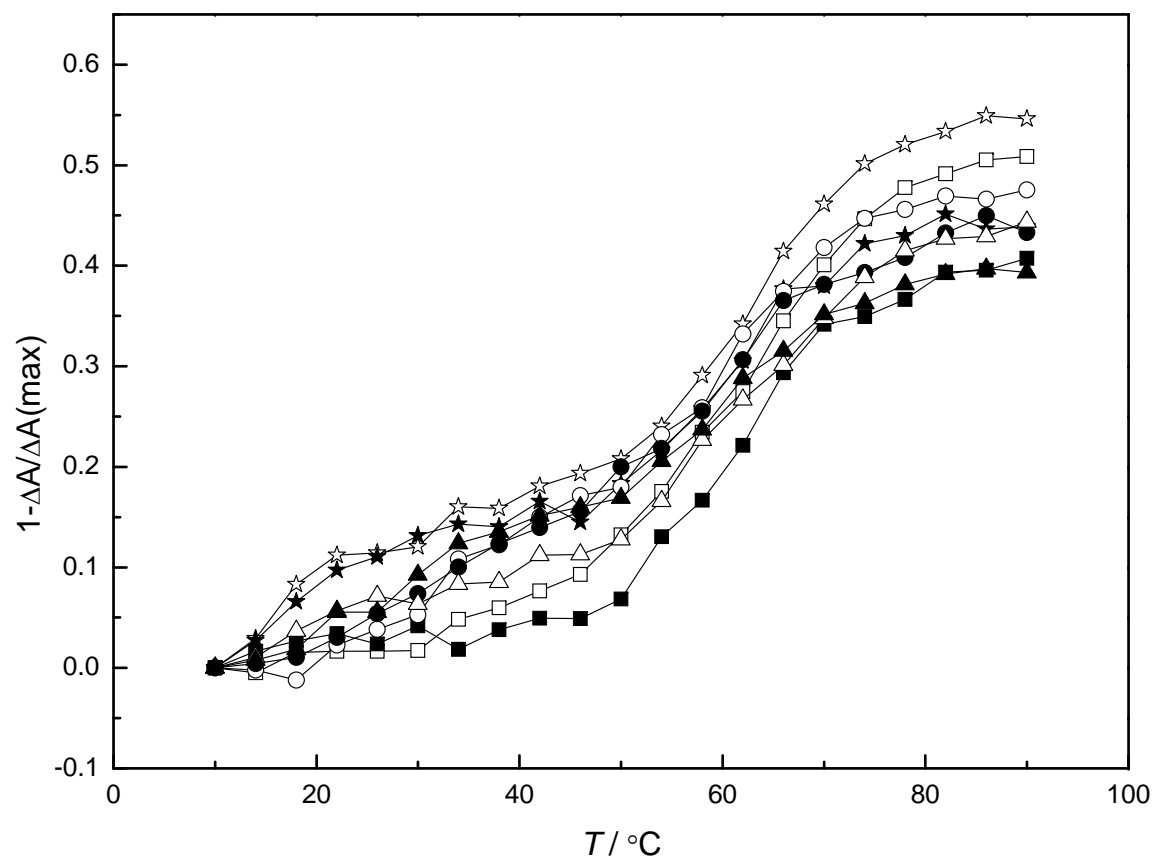

**Figure S4.** Temperature vs.  $1 - \Delta A / \Delta A(\max)$  profiles of the homoduplexes formed between **7A** and 2'-*O*-methyl-RNA oligonucleotides in the presence and absence of  $\text{Pd}^{2+}$ ; scan range 220 – 320 nm;  $I(\text{NaClO}_4) = 0.1 \text{ M}$ ;  $\text{pH} = 7.4$ . ( $\square$ ) **7A:8C**, ( $\blacksquare$ ) **7A:8C + Pd<sup>2+</sup>**, ( $\circ$ ) **7A:8G**, ( $\bullet$ ) **7A:8G + Pd<sup>2+</sup>**, ( $\star$ ) **7A:8U**, ( $\blackstar$ ) **7A:8U + Pd<sup>2+</sup>**, ( $\triangle$ ) **7A:8A**, ( $\blacktriangle$ ) **7A:8A + Pd<sup>2+</sup>**.

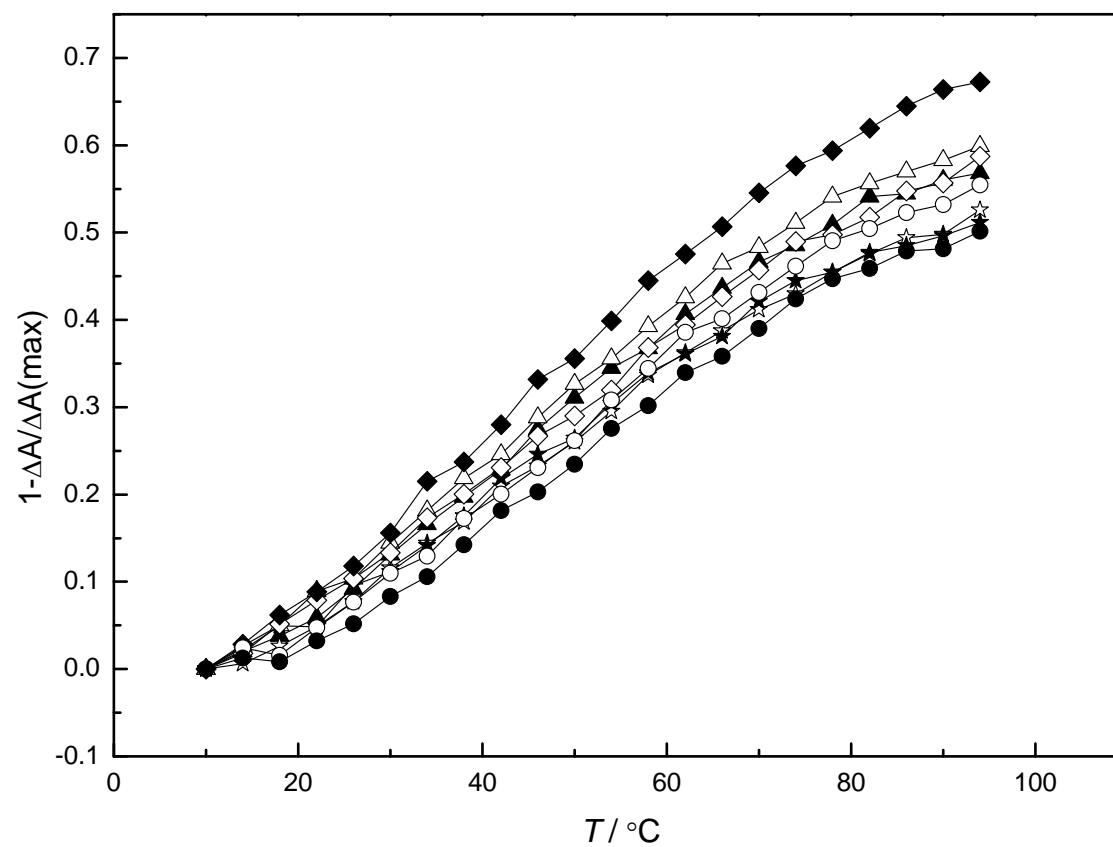

**Figure S5.** Temperature vs.  $1 - \Delta A/\Delta A(\max)$  profiles of the mismatched homoduplexes formed between **7A** and 2'-*O*-methyl-RNA oligonucleotides in the presence and absence of  $\text{Pd}^{2+}$ ; scan range 220 – 320 nm;  $I(\text{NaClO}_4) = 0.1 \text{ M}$ ;  $\text{pH} = 7.4$ . ( $\diamond$ ) **7A:9C**, ( $\blacklozenge$ ) **7A:9C** +  $\text{Pd}^{2+}$ , ( $\triangle$ ) **7A:9A**, ( $\blacktriangle$ ) **7A:9A** +  $\text{Pd}^{2+}$ , ( $\circ$ ) **7A:9G**, ( $\bullet$ ) **7A:9G** +  $\text{Pd}^{2+}$ , ( $\star$ ) **7A:9U**, ( $\blackstar$ ) **7A:9U** +  $\text{Pd}^{2+}$ .

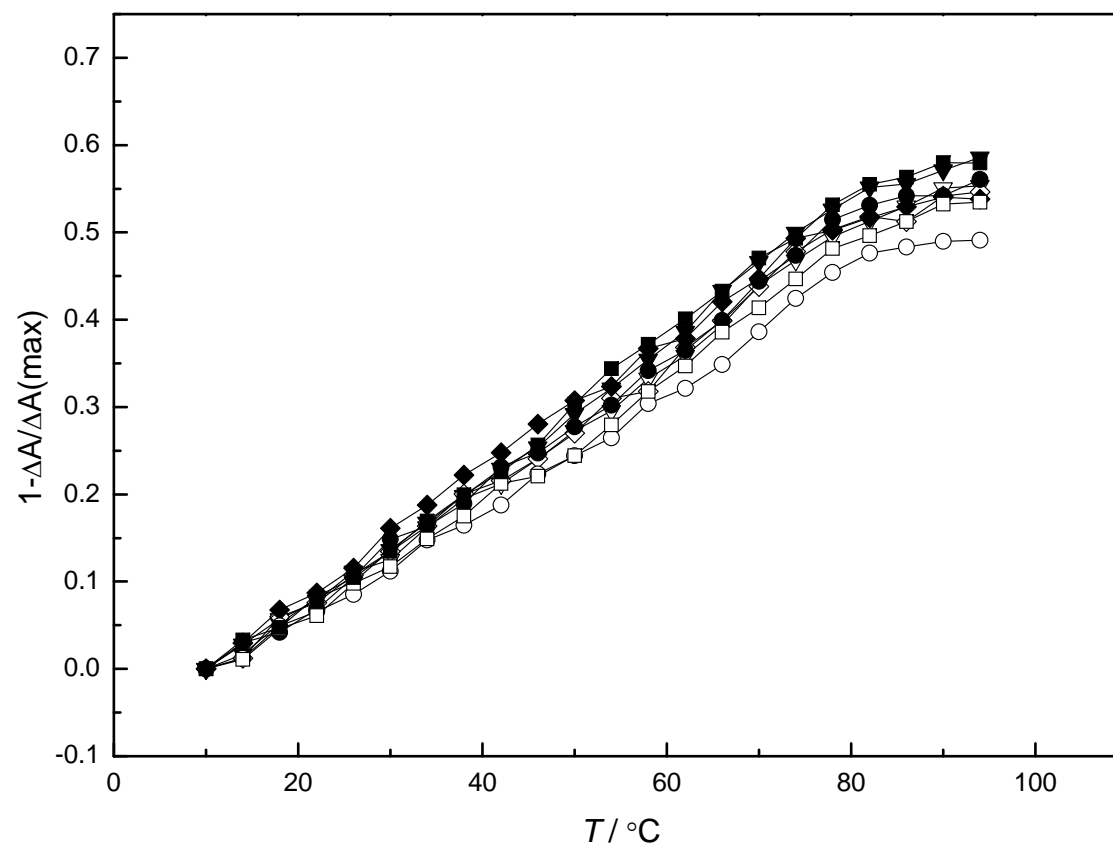

**Figure S6.** Temperature vs.  $1 - \Delta A / \Delta A(\max)$  profiles of the mismatched homoduplexes formed between **7A** and 2'-*O*-methyl-RNA oligonucleotides in the presence and absence of  $\text{Pd}^{2+}$ ; scan range 220 – 320 nm;  $I(\text{NaClO}_4) = 0.1 \text{ M}$ ;  $\text{pH} = 7.4$ . ( $\square$ ) **7X:9C**, ( $\blacksquare$ ) **7X:9C + Pd<sup>2+</sup>**, ( $\nabla$ ) **7X:9A**, ( $\blacktriangledown$ ) **7X:9A + Pd<sup>2+</sup>**, ( $\circ$ ) **7X:9G**, ( $\bullet$ ) **7X:9G + Pd<sup>2+</sup>**, ( $\diamond$ ) **7X:9U**, ( $\blacklozenge$ ) **7X:9U + Pd<sup>2+</sup>**.



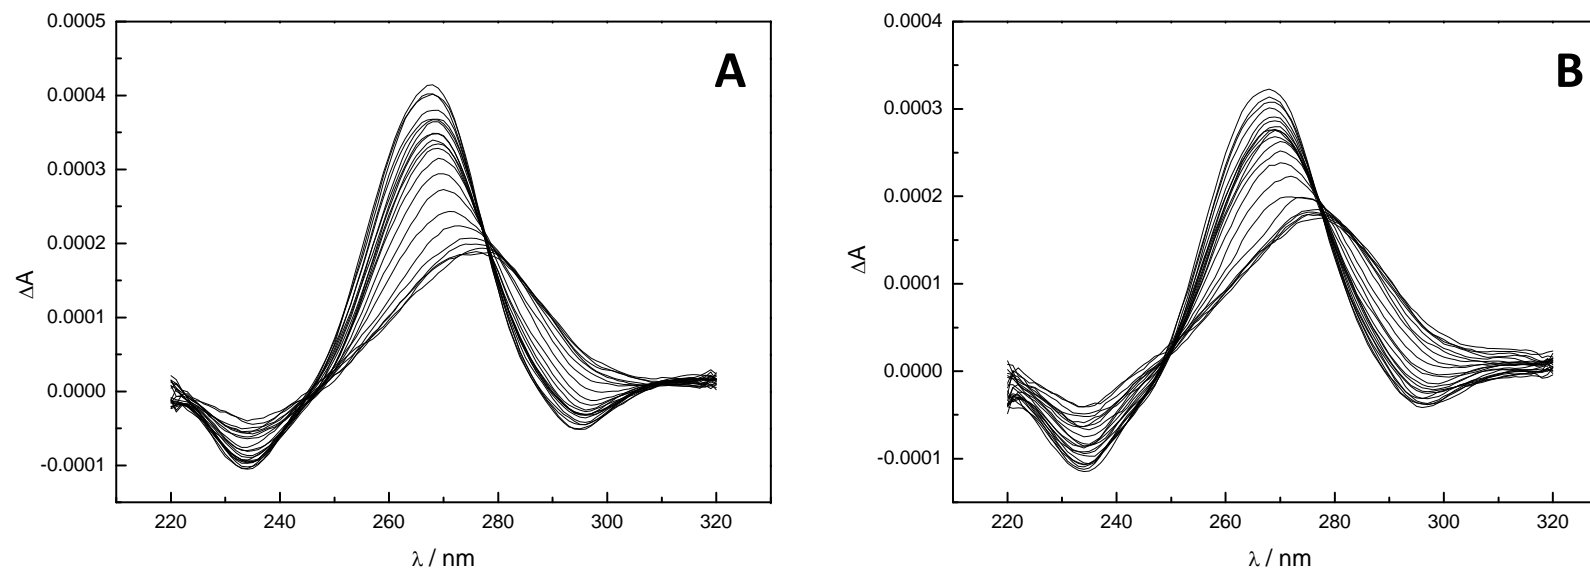

**Figure S7.** CD spectra of the homoduplex **7X:8U** in the absence (A) and presence (B) of  $\text{Pd}^{2+}$ ;  $I(\text{NaClO}_4) = 0.1 \text{ mol L}^{-1}$ ,  $\text{pH} = 7.4$ .

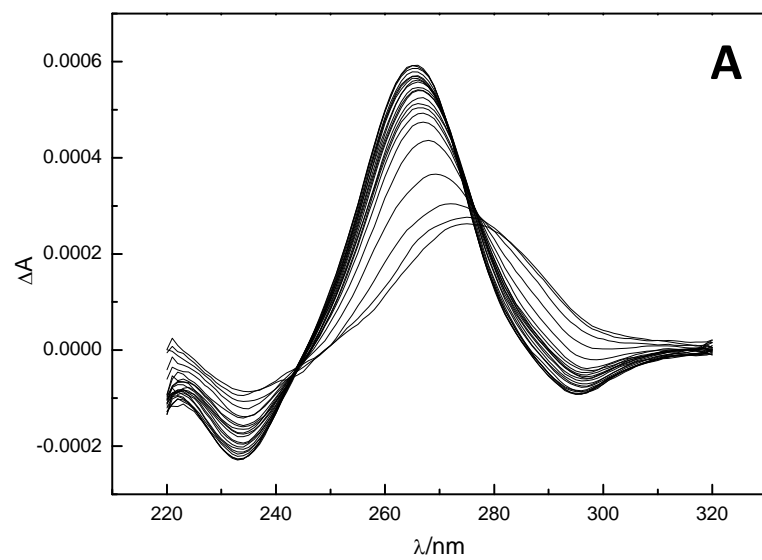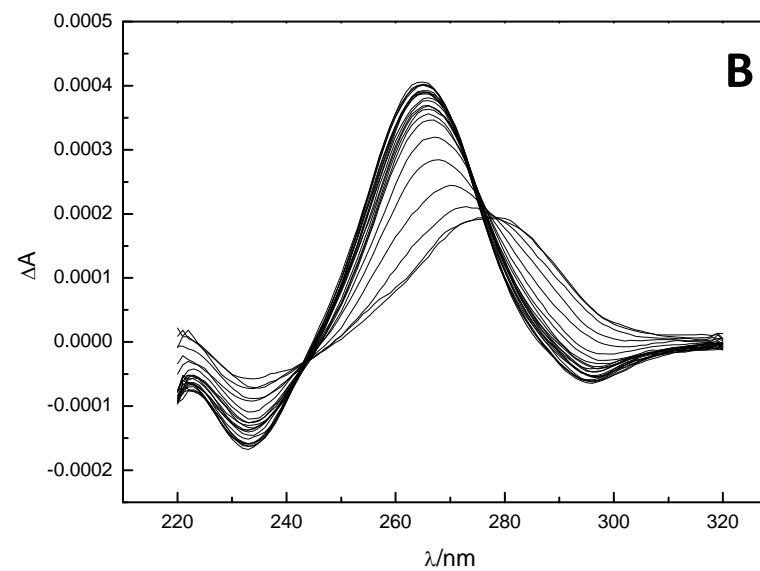

**Figure S8.** CD spectra of the homoduplex **7A:8U** in the absence (A) and presence (B) of Pd<sup>2+</sup>;  $I(\text{NaClO}_4) = 0.1 \text{ mol L}^{-1}$ , pH = 7.4.

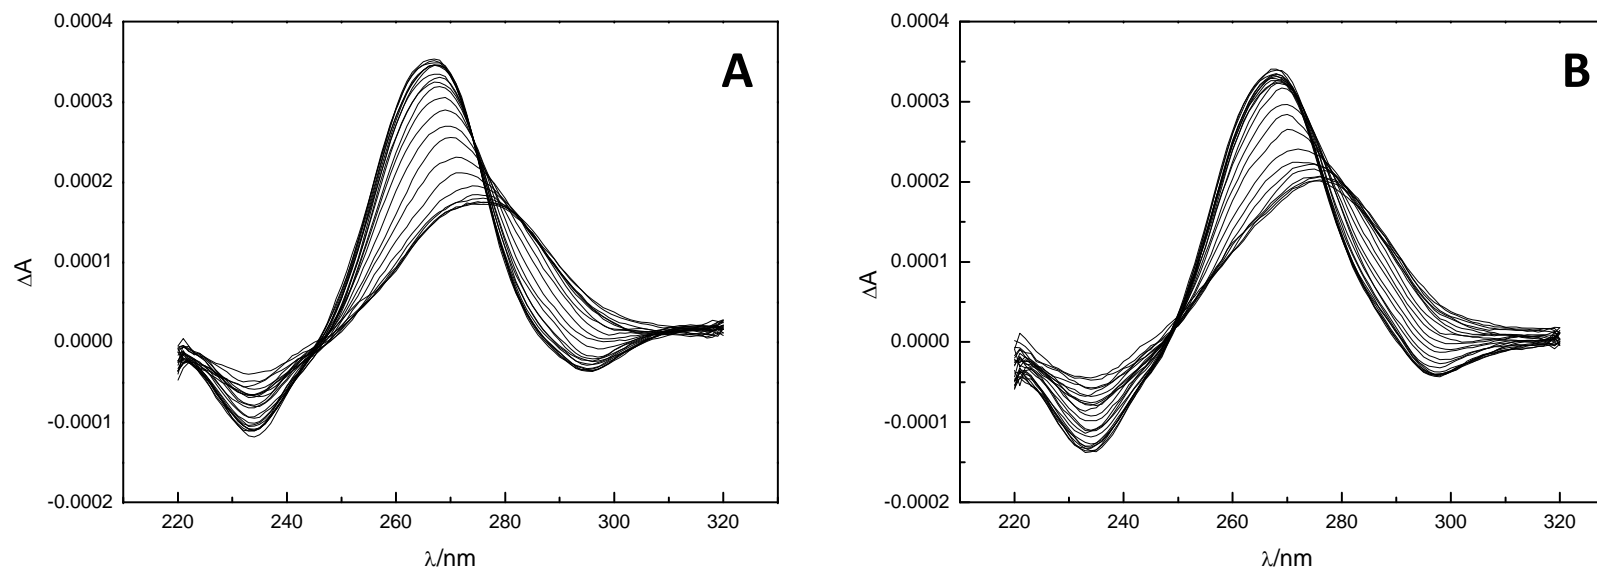

**Figure S9.** CD spectra of the homoduplex **7X:8C** in the absence (A) and presence (B) of  $\text{Pd}^{2+}$ ;  $I(\text{NaClO}_4) = 0.1 \text{ mol L}^{-1}$ ,  $\text{pH} = 7.4$ .

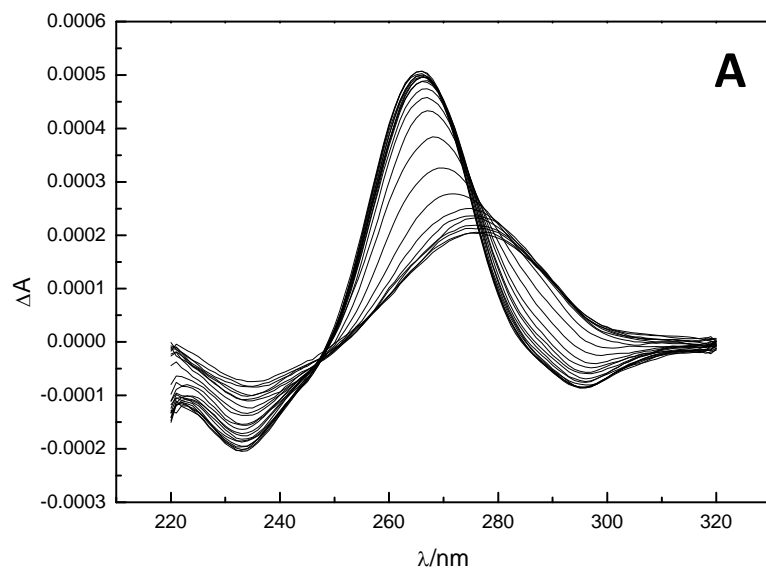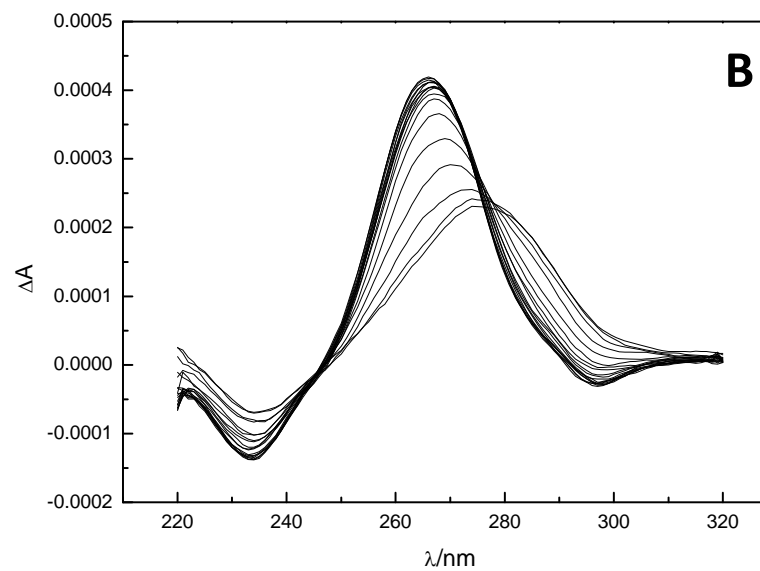

**Figure S10.** CD spectra of the homoduplex **7A:8C** in the absence (A) and presence (B) of Pd<sup>2+</sup>;  $I(\text{NaClO}_4) = 0.1 \text{ mol L}^{-1}$ , pH = 7.4.

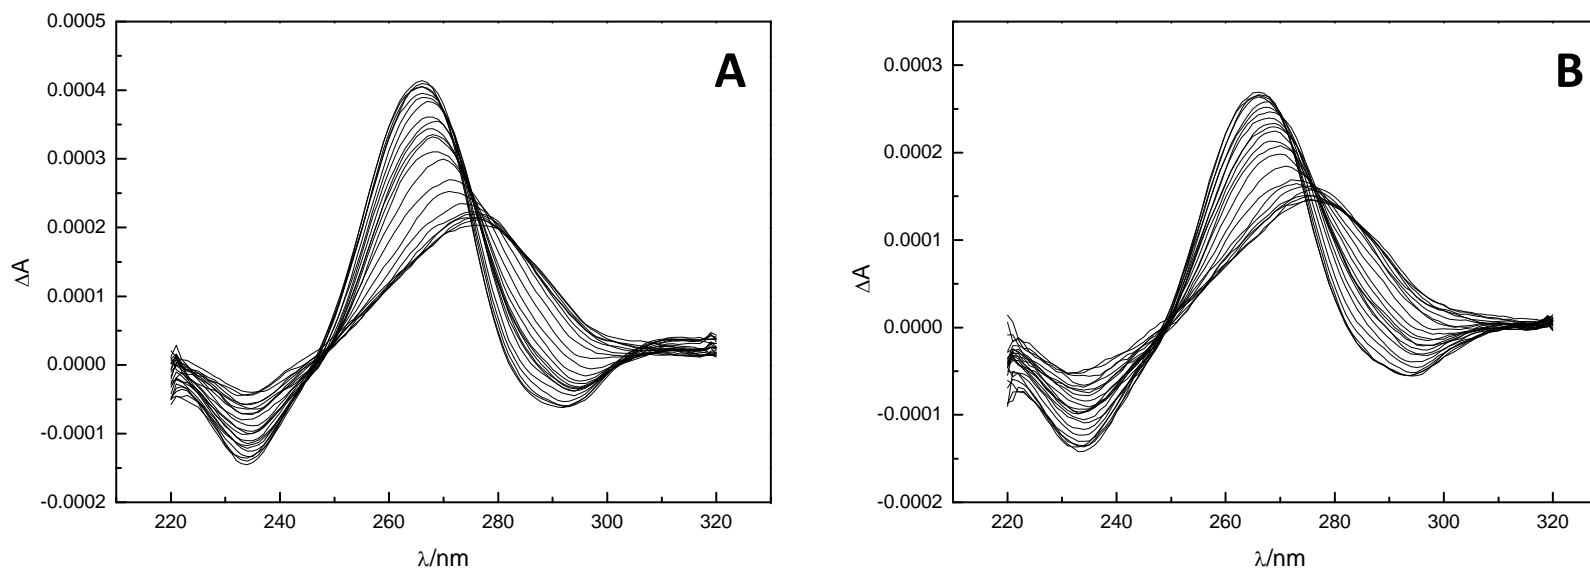

**Figure S11.** CD spectra of the homoduplex **7X:8G** in the absence (A) and presence (B) of  $\text{Pd}^{2+}$ ;  $I(\text{NaClO}_4) = 0.1 \text{ mol L}^{-1}$ ,  $\text{pH} = 7.4$ .

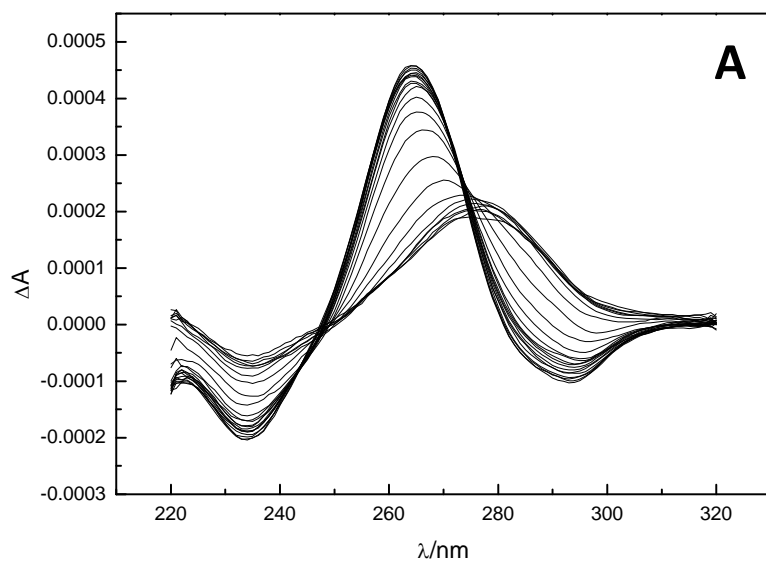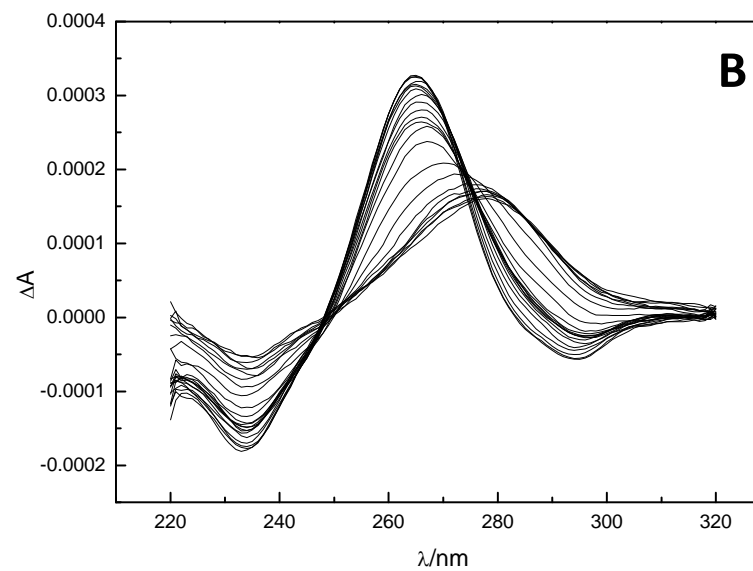

**Figure S12.** CD spectra of the homoduplex **7A:8G** in the absence (A) and presence (B) of Pd<sup>2+</sup>;  $I(\text{NaClO}_4) = 0.1 \text{ mol L}^{-1}$ , pH = 7.4.

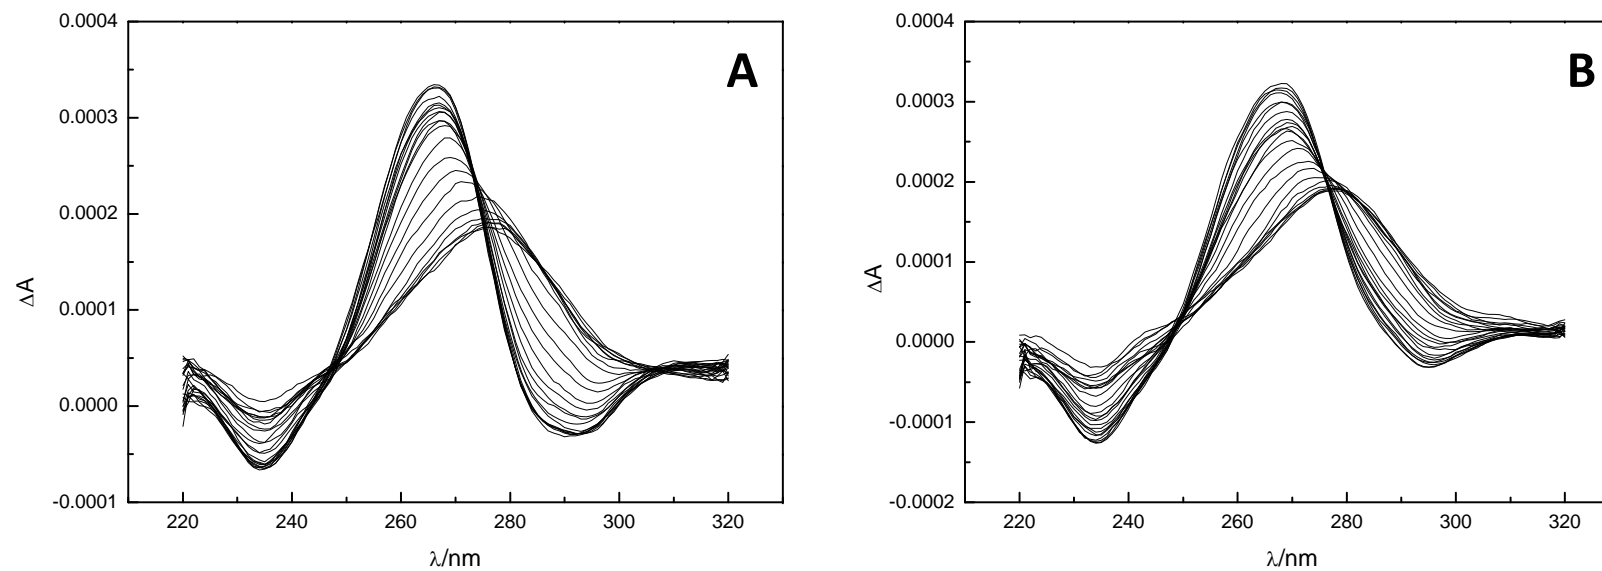

**Figure S13.** CD spectra of the homoduplex **7X:8A** in the absence (A) and presence (B) of  $\text{Pd}^{2+}$ ;  $I(\text{NaClO}_4) = 0.1 \text{ mol L}^{-1}$ ,  $\text{pH} = 7.4$ .

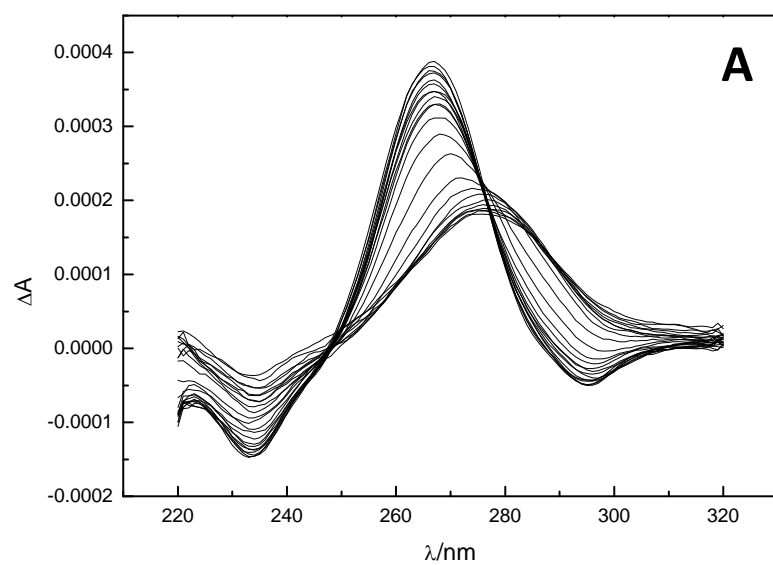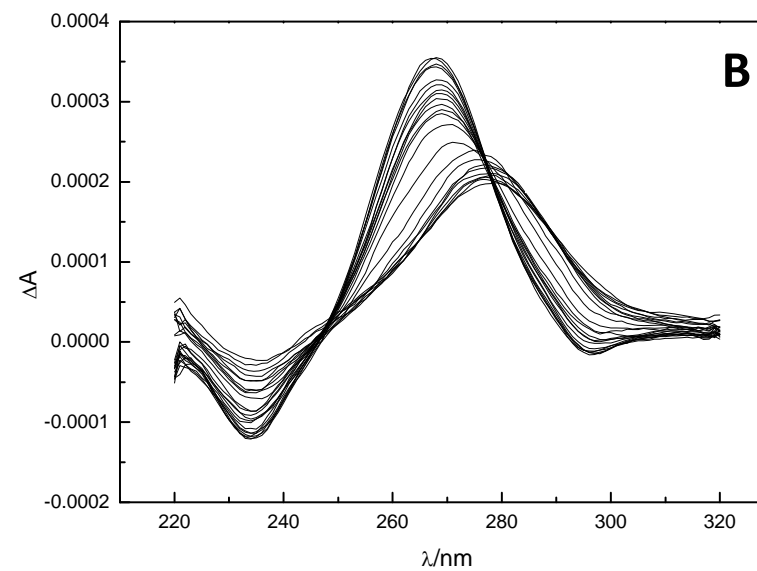

**Figure S14.** CD spectra of the homoduplex **7A:8A** in the absence (A) and presence (B) of Pd<sup>2+</sup>;  $I(\text{NaClO}_4) = 0.1 \text{ mol L}^{-1}$ , pH = 7.4.



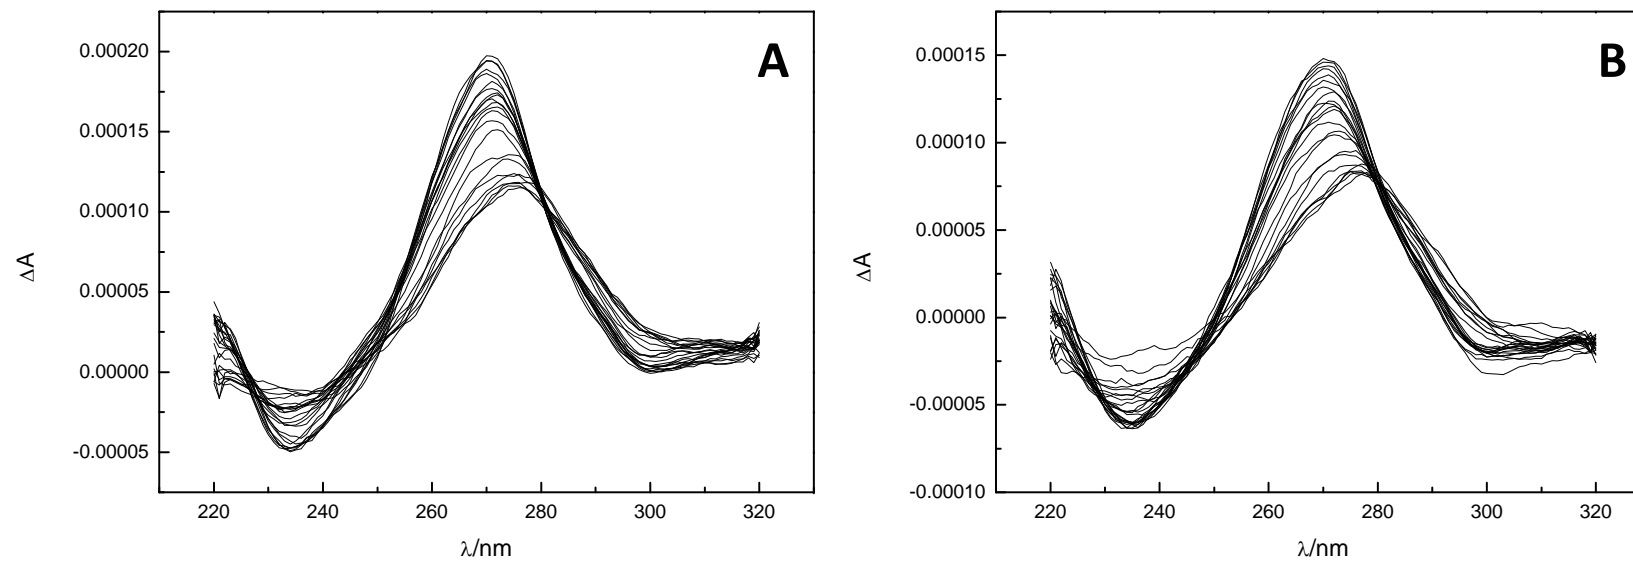

**Figure S15.** CD spectra of the heteroduplex **7X:10A** in the absence (A) and presence (B) of  $\text{Pd}^{2+}$ ;  $I(\text{NaClO}_4) = 0.1 \text{ mol L}^{-1}$ ,  $\text{pH} = 7.4$ .

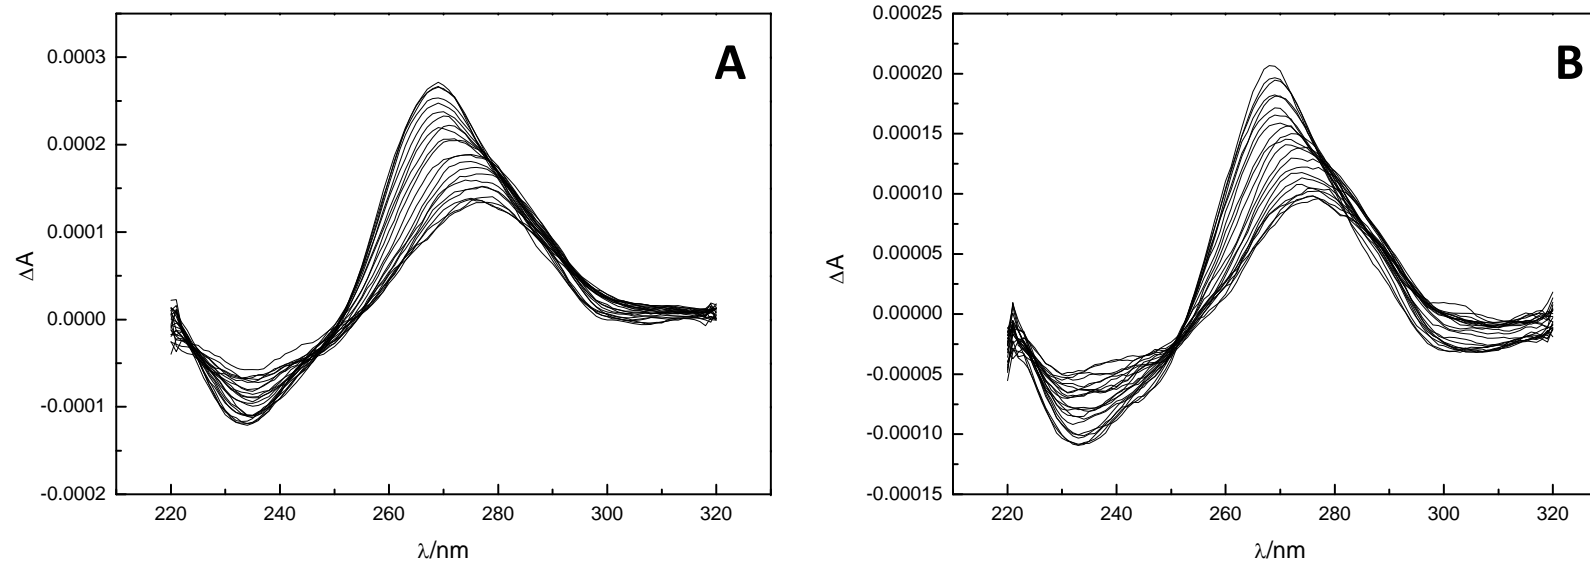

**Figure S16.** CD spectra of the heteroduplex **7A:10A** in the absence (A) and presence (B) of Pd<sup>2+</sup>;  $I(\text{NaClO}_4) = 0.1 \text{ mol L}^{-1}$ , pH = 7.4.

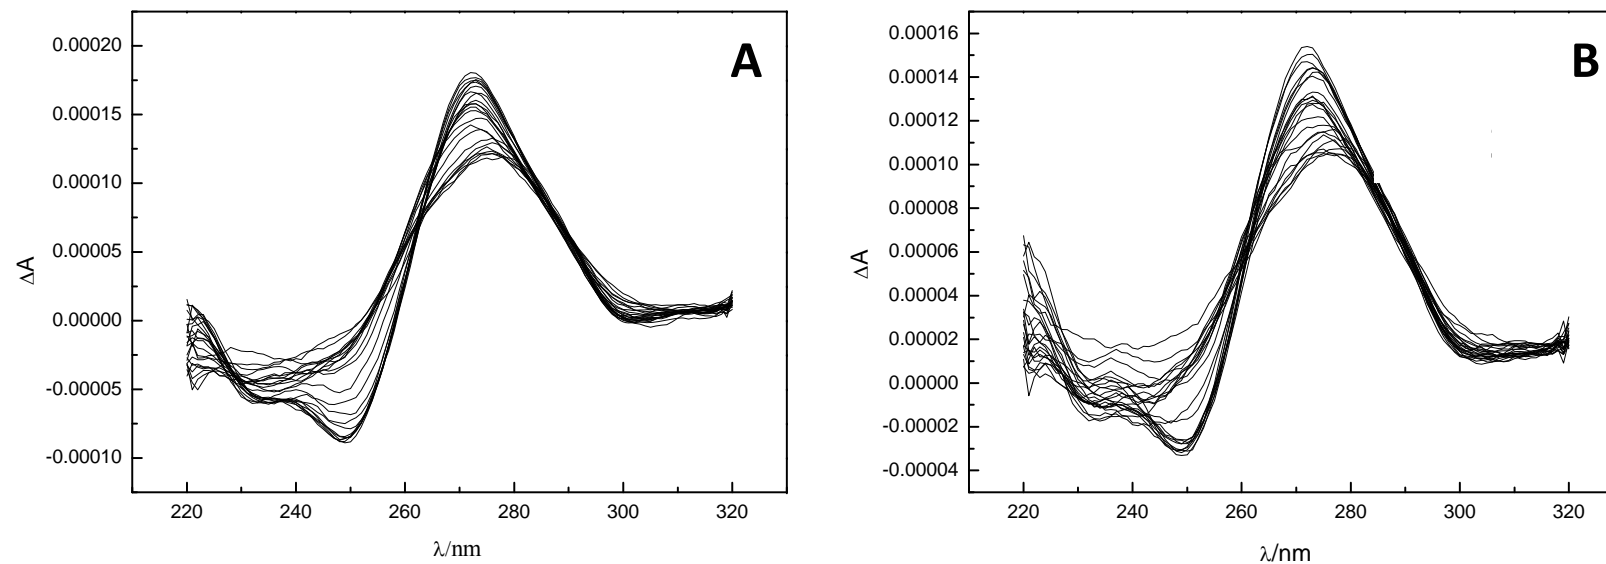

**Figure S17.** CD spectra of the heteroduplex **7X:10C** in the absence (A) and presence (B) of  $\text{Pd}^{2+}$ ;  $I(\text{NaClO}_4) = 0.1 \text{ mol L}^{-1}$ ,  $\text{pH} = 7.4$ .

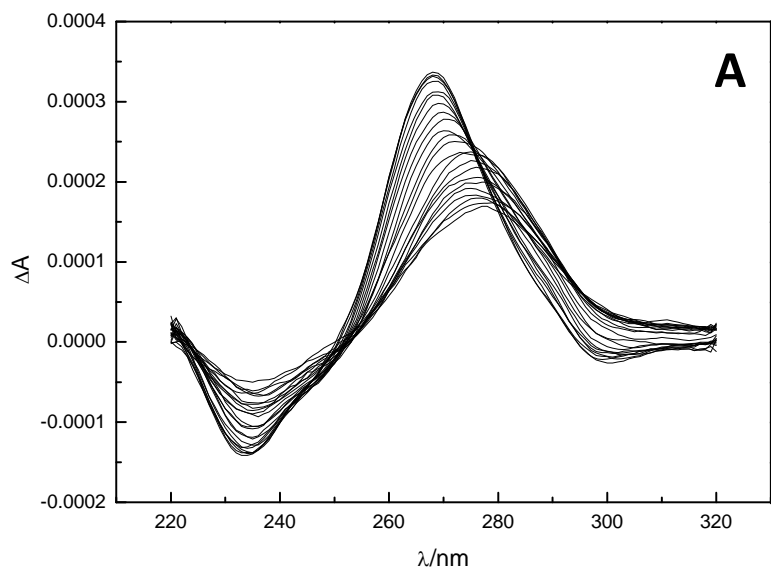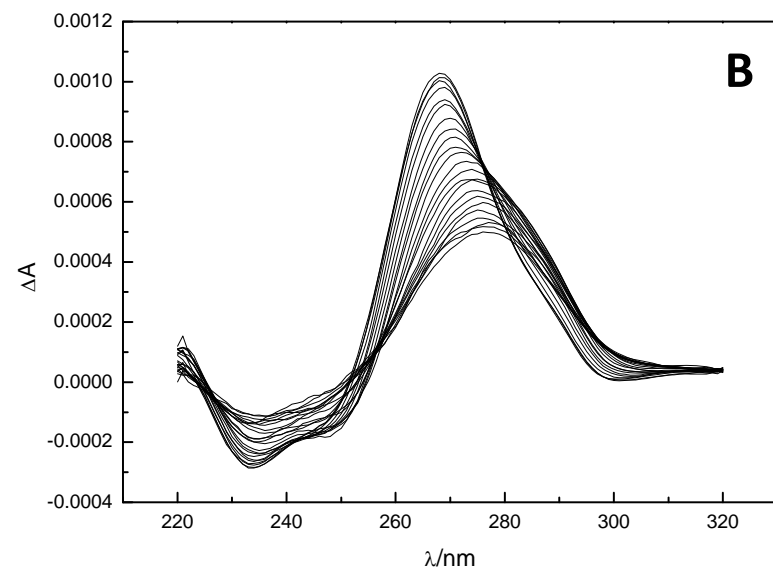

**Figure S18.** CD spectra of the heteroduplex **7A:10C** in the absence (A) and presence (B) of Pd<sup>2+</sup>;  $I(\text{NaClO}_4) = 0.1 \text{ mol L}^{-1}$ , pH = 7.4.

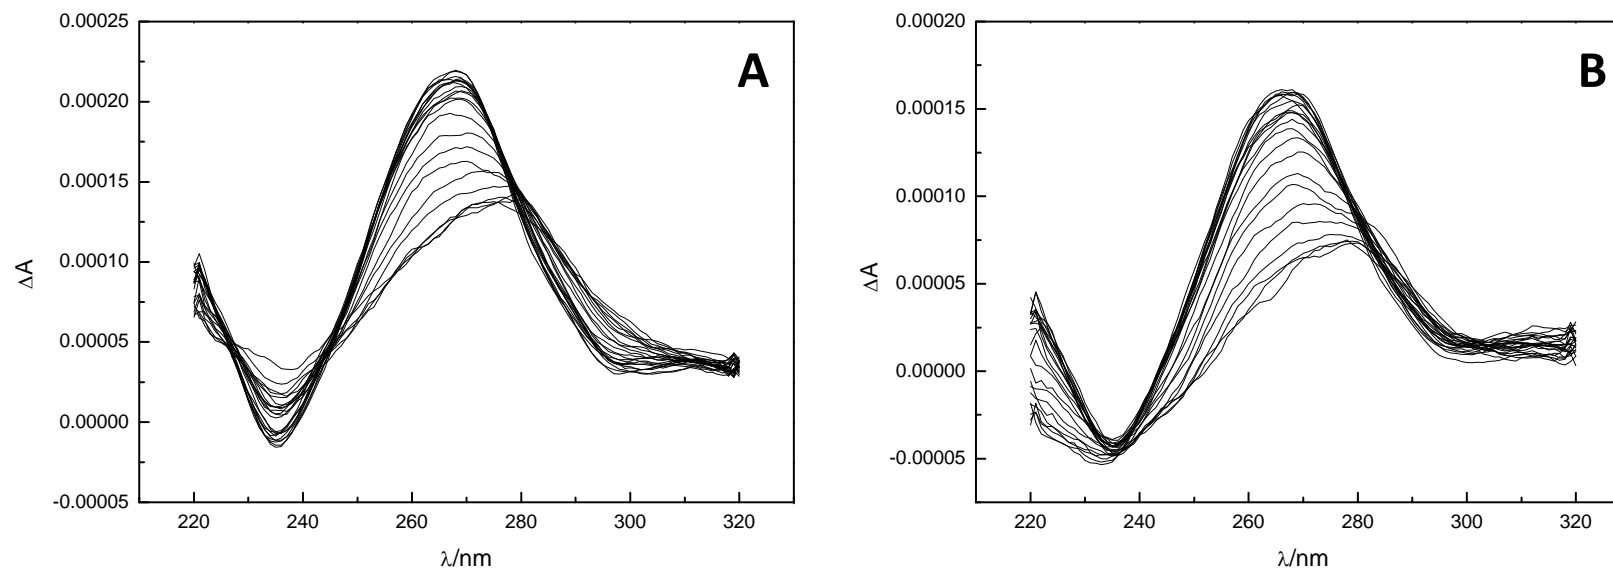

**Figure S19.** CD spectra of the heteroduplex **7X:10G** in the absence (A) and presence (B) of  $\text{Pd}^{2+}$ ;  $I(\text{NaClO}_4) = 0.1 \text{ mol L}^{-1}$ ,  $\text{pH} = 7.4$ .

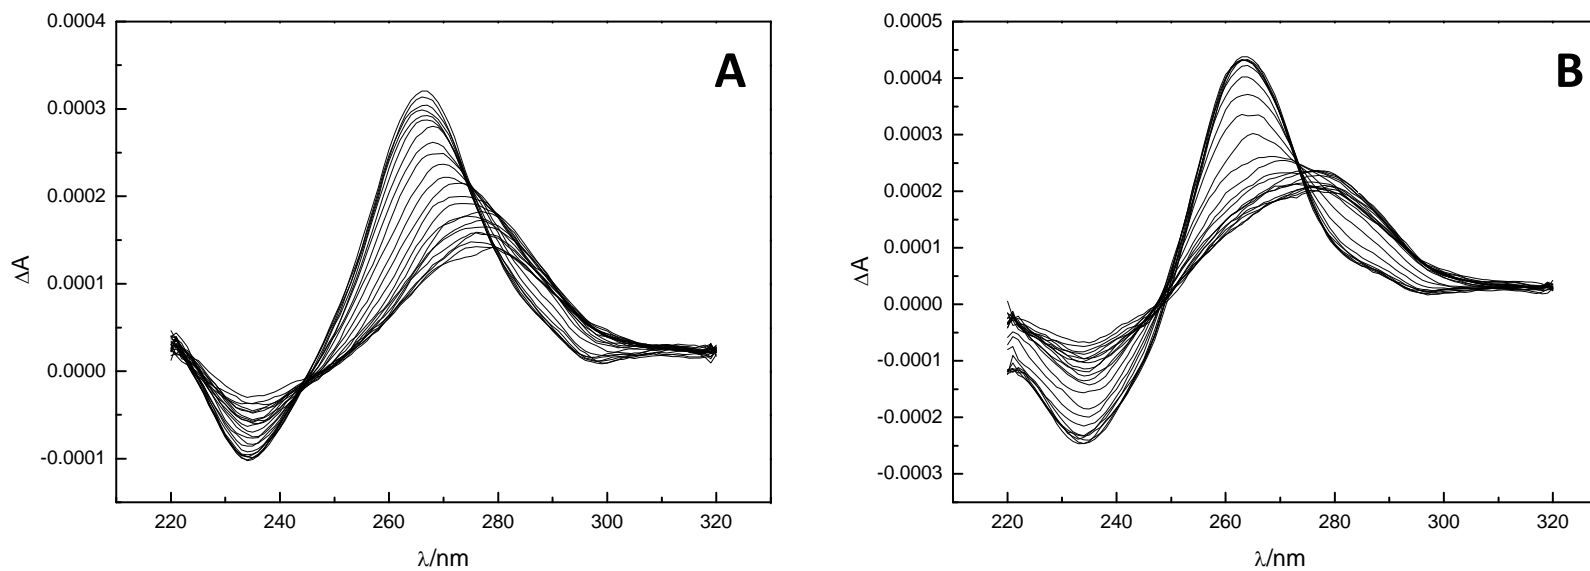

**Figure S20.** CD spectra of the heteroduplex **7A:10G** in the absence (A) and presence (B) of  $\text{Pd}^{2+}$ ;  $I(\text{NaClO}_4) = 0.1 \text{ mol L}^{-1}$ ,  $\text{pH} = 7.4$ .

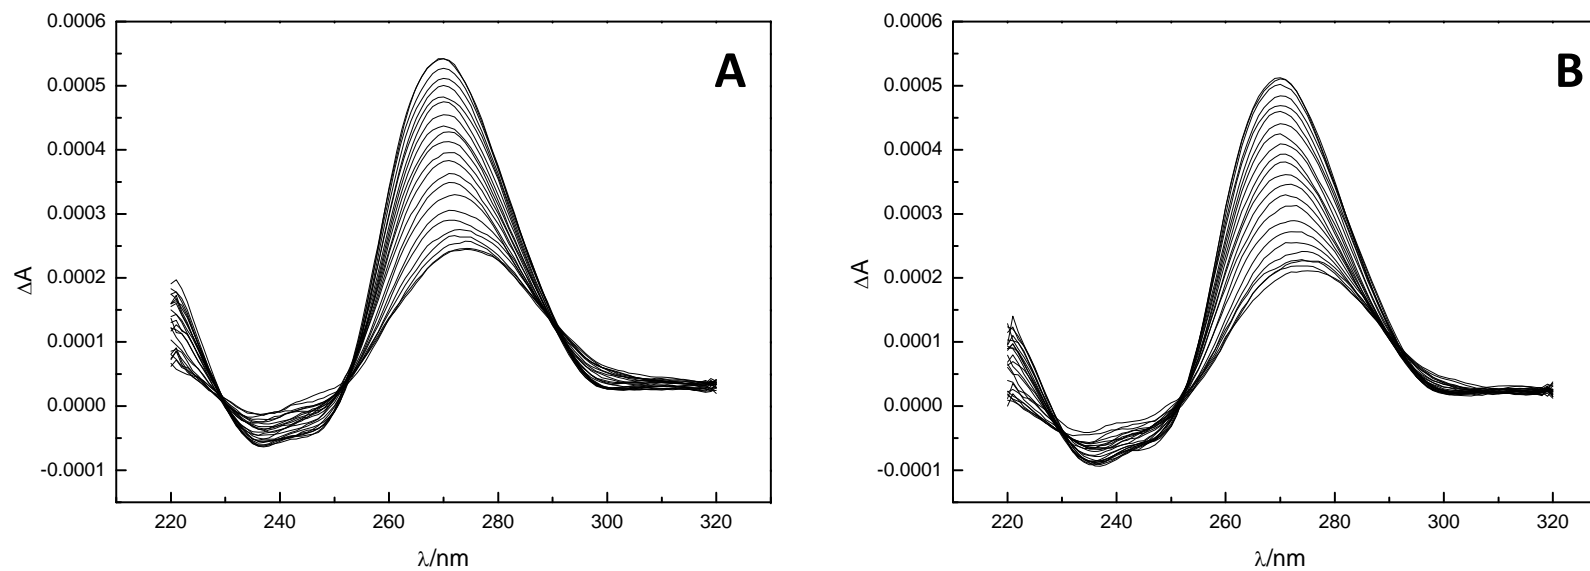

**Figure S21.** CD spectra of the mismatched homoduplex **7X:9A** in the absence (A) and presence (B) of  $\text{Pd}^{2+}$ ;  $I(\text{NaClO}_4) = 0.1 \text{ mol L}^{-1}$ ,  $\text{pH} = 7.4$ .

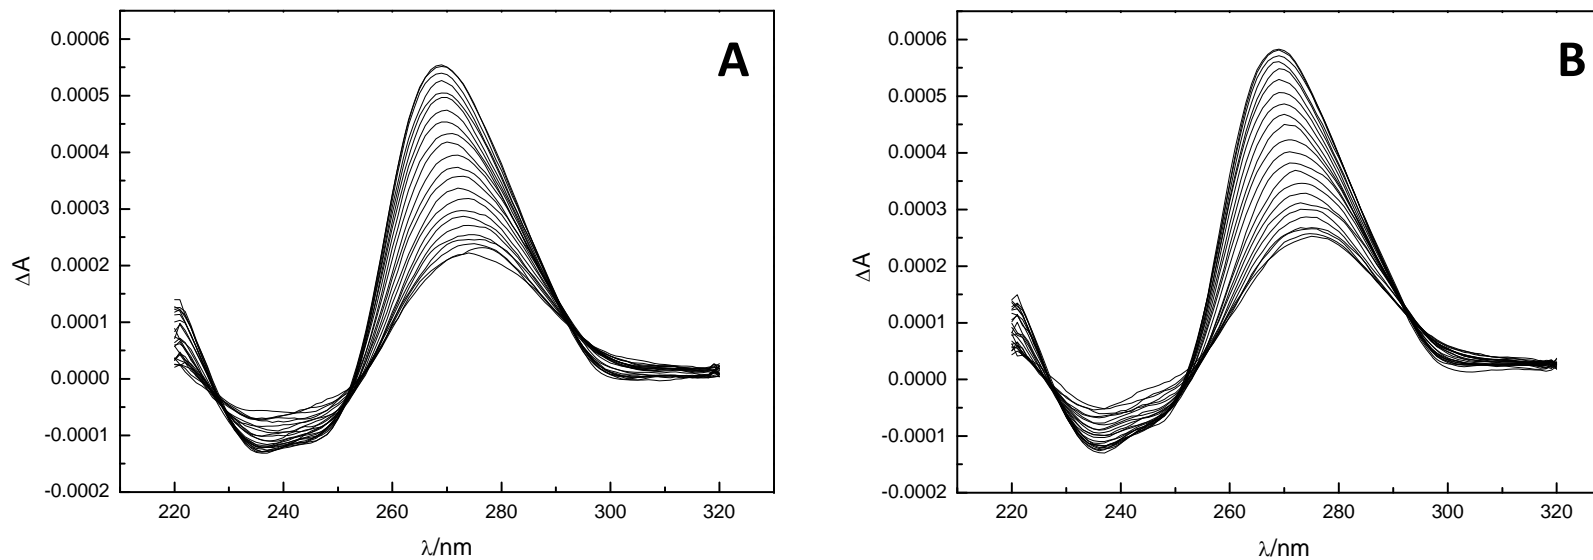

**Figure S22.** CD spectra of the mismatched homoduplex **7A:9A** in the absence (A) and presence (B) of  $\text{Pd}^{2+}$ ;  $I(\text{NaClO}_4) = 0.1 \text{ mol L}^{-1}$ ,  $\text{pH} = 7.4$ .



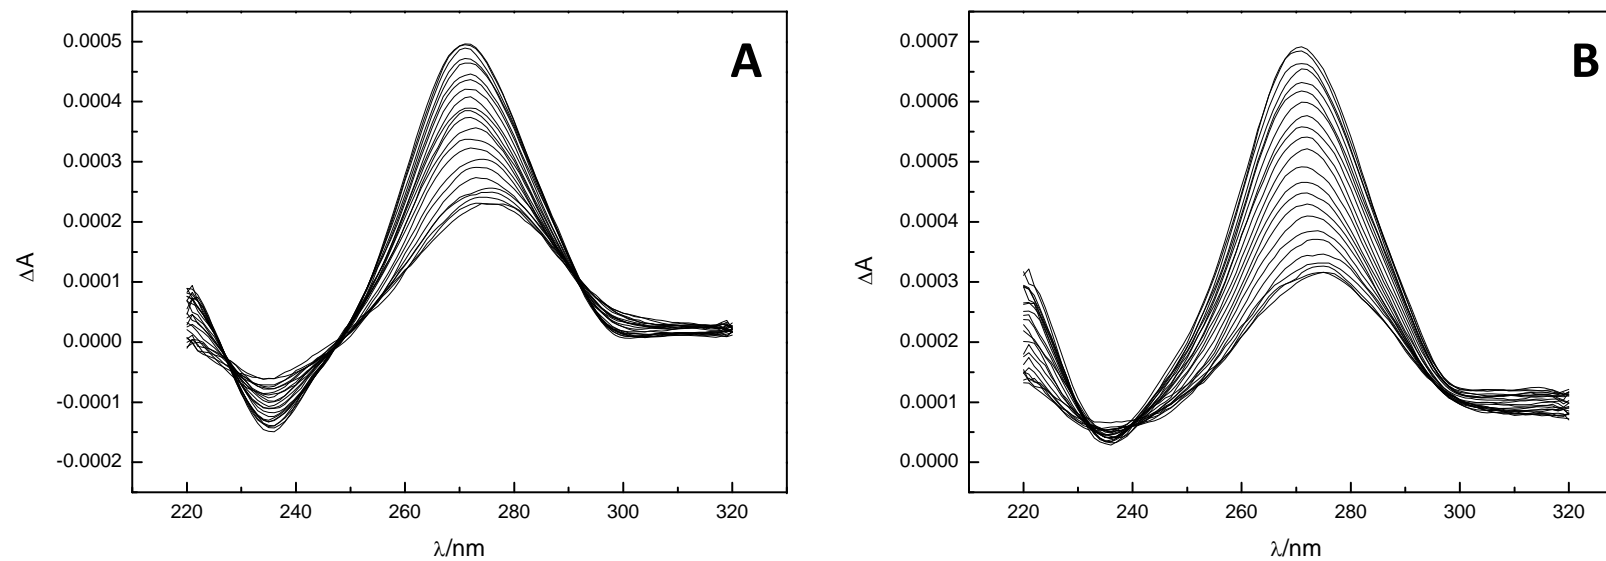

**Figure S23.** CD spectra of the mismatched homoduplex **7X:9C** in the absence (A) and presence (B) of  $\text{Pd}^{2+}$ ;  $I(\text{NaClO}_4) = 0.1 \text{ mol L}^{-1}$ ,  $\text{pH} = 7.4$ .

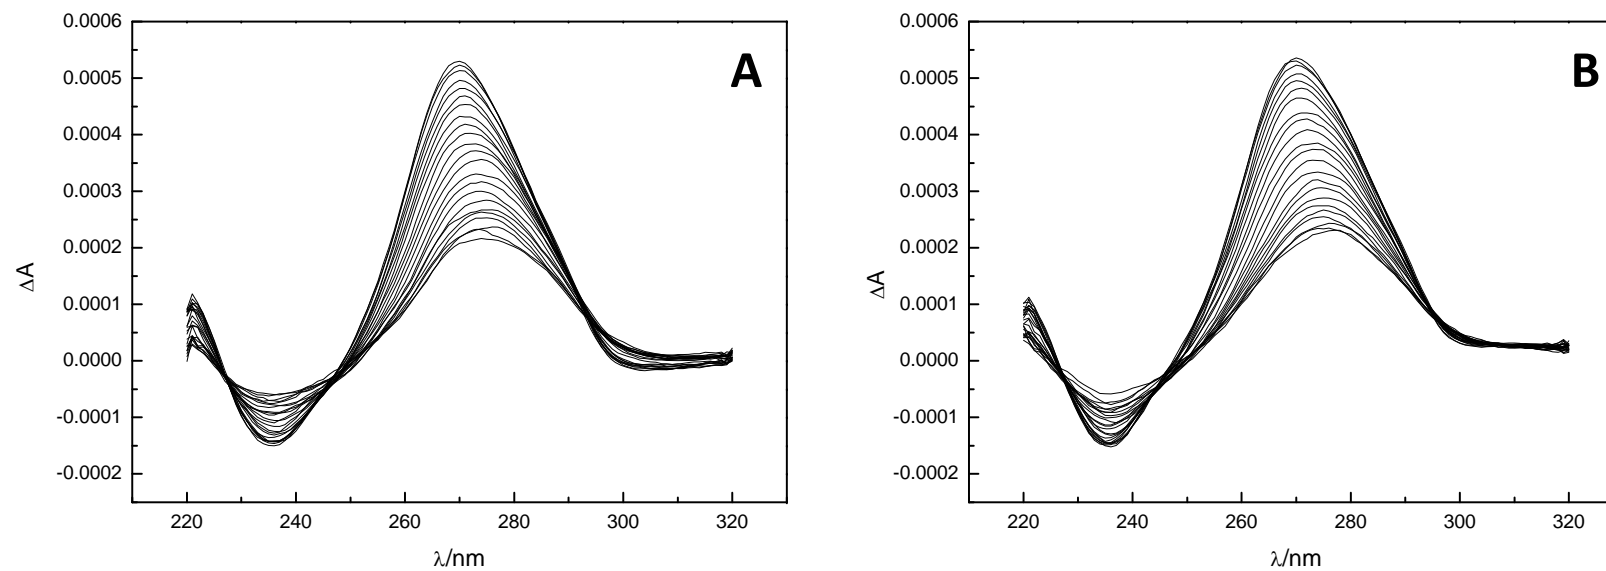

**Figure S24.** CD spectra of the mismatched homoduplex **7A:9C** in the absence (A) and presence (B) of  $\text{Pd}^{2+}$ ;  $I(\text{NaClO}_4) = 0.1 \text{ mol L}^{-1}$ ,  $\text{pH} = 7.4$ .

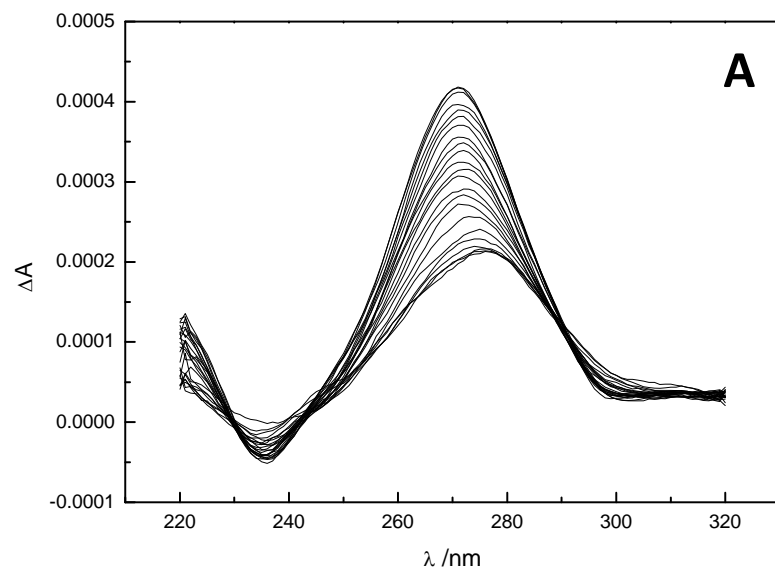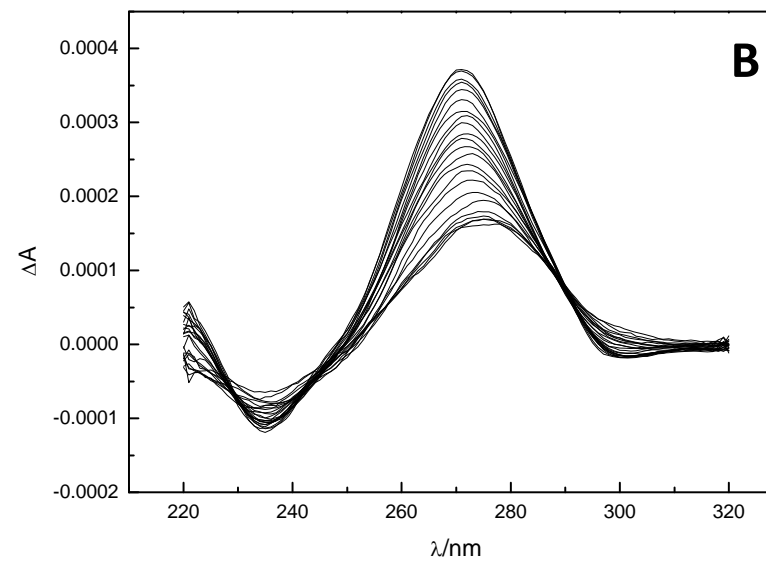

**Figure S25.** CD spectra of the mismatched homoduplex **7X:9G** in the absence (A) and presence (B) of Pd<sup>2+</sup>;  $I(\text{NaClO}_4) = 0.1 \text{ mol L}^{-1}$ , pH = 7.4.

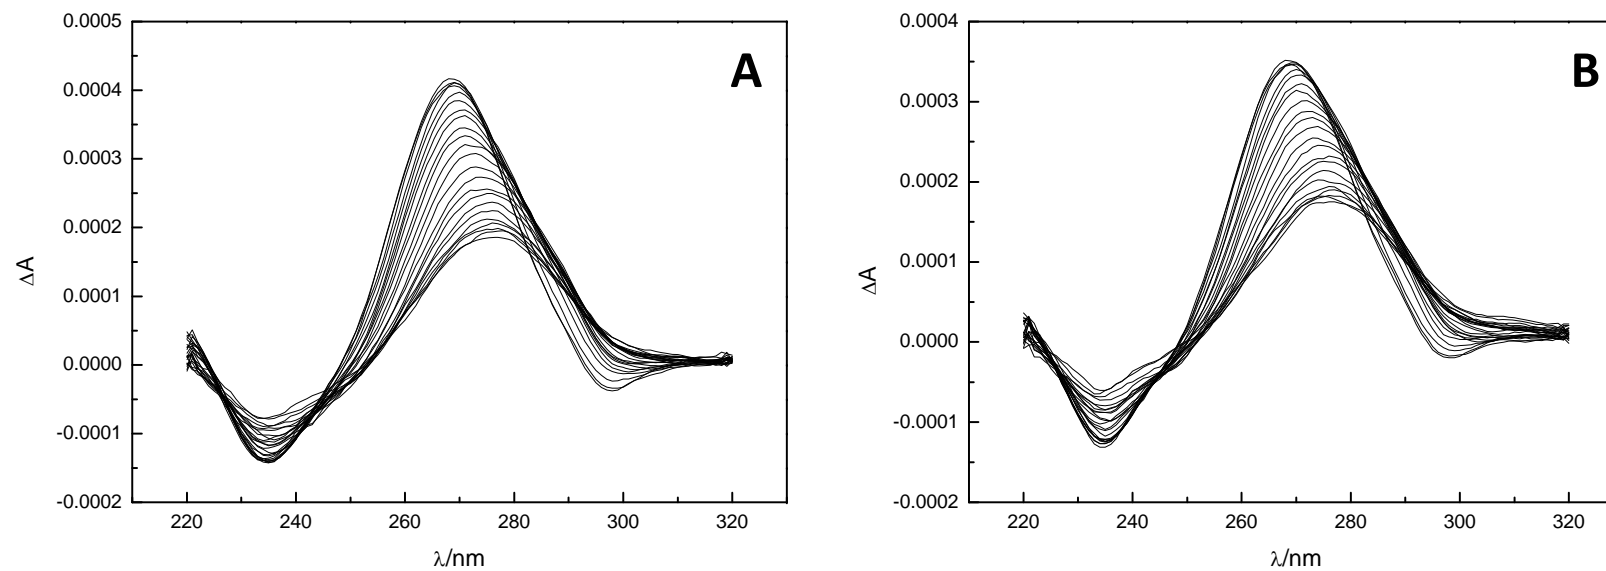

**Figure S26.** CD spectra of the mismatched homoduplex **7A:9G** in the absence (A) and presence (B) of  $\text{Pd}^{2+}$ ;  $I(\text{NaClO}_4) = 0.1 \text{ mol L}^{-1}$ ,  $\text{pH} = 7.4$ .

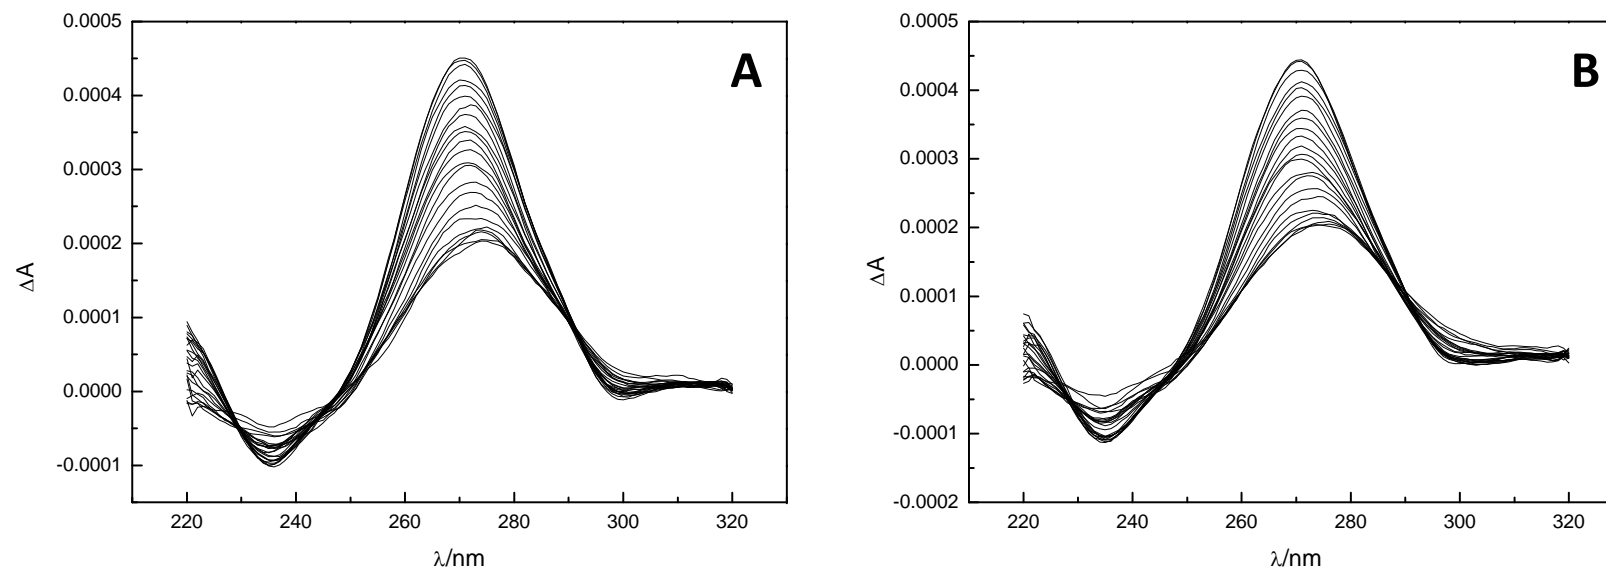

**Figure S27.** CD spectra of the mismatched homoduplex **7X:9U** in the absence (A) and presence (B) of  $\text{Pd}^{2+}$ ;  $I(\text{NaClO}_4) = 0.1 \text{ mol L}^{-1}$ ,  $\text{pH} = 7.4$ .

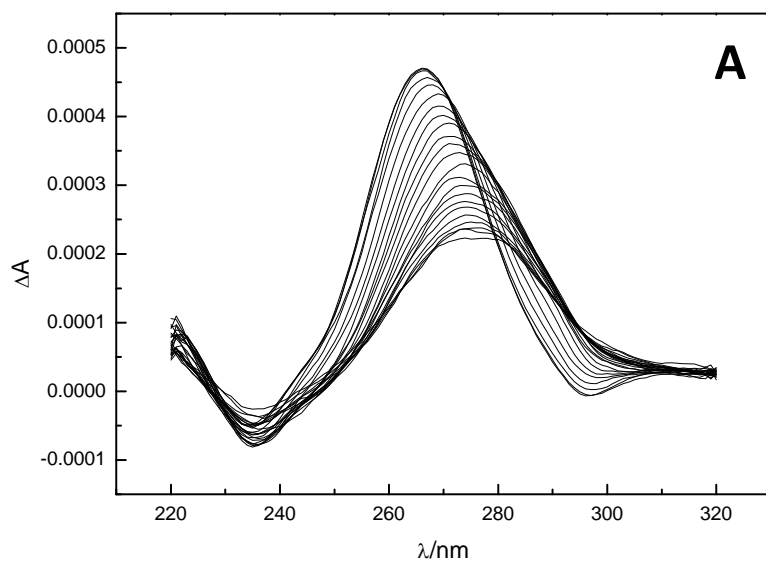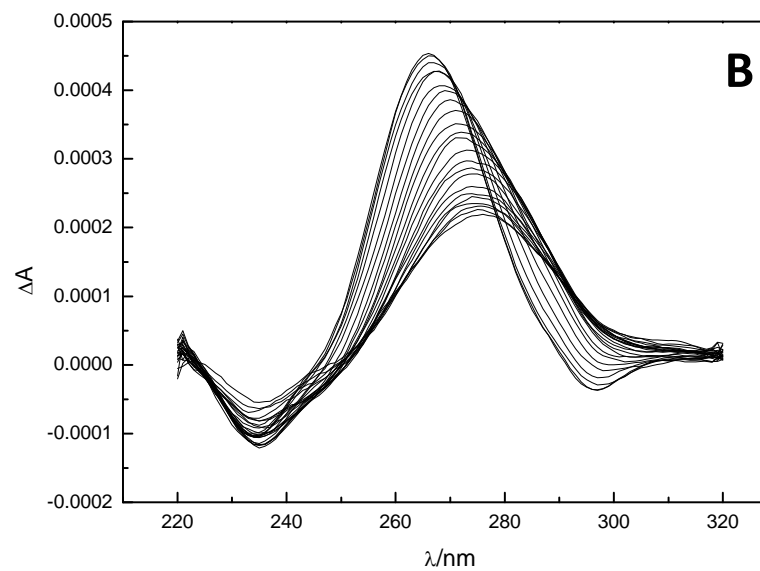

**Figure S28.** CD spectra of the mismatched homoduplex **7A:9U** in the absence (A) and presence (B) of Pd<sup>2+</sup>;  $I(\text{NaClO}_4) = 0.1 \text{ mol L}^{-1}$ , pH = 7.4.

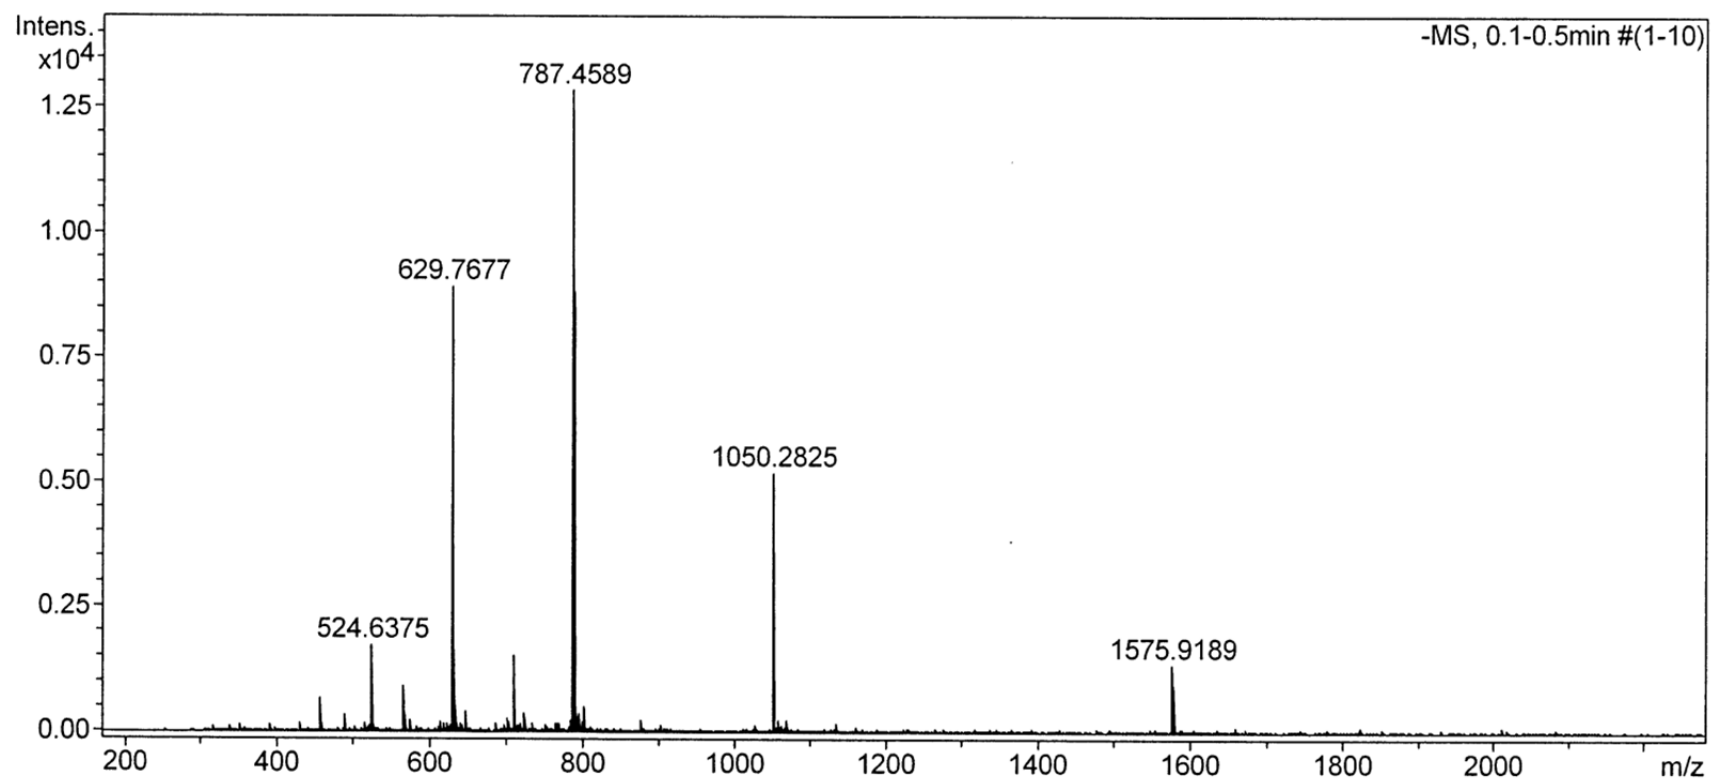

**Figure S29.** ESI mass spectrum of the modified oligonucleotide **7X**.
